# Supplementary material for: Health-Related Quality of Life and Sleep Quality after 12 Months of Treatment in Nonsevere Obstructive Sleep Apnea: A Randomized Clinical Trial with Continuous Positive Airway Pressure and Mandibular Advancement Splints
Source: Hindawi journal article supplement (doi:10.1155/2020/2856460), 2020-07-01
Supplement: f1 [file 2856460.f1.pdf]

## Supplementary Materials

Supplementary tables presenting SF36 domain scores at baseline and follow-up according to the 0-100 scales. Intention-to-treat analyses (Table S1), per protocol analyses (Table S2) and complete case analyses (Table S3) are provided. Table S4 present complete case analyses of the norm-based SF36 domain scores and PSQI global score at baseline and follow-up.

Supplementary Table S1 SF36 domains (0-100 scales) at baseline and final follow-up (12 months), intention-to-treat.

| SF36 domains                | Baseline       |                | Final follow-up |                 | P    |
|-----------------------------|----------------|----------------|-----------------|-----------------|------|
|                             | CPAP<br>(n=55) | MAS<br>(n=49)  | CPAP<br>(n=55)  | MAS<br>(n=49)   |      |
| <b>Physical functioning</b> | 83.7<br>(16.7) | 81.6<br>(16.1) | 87.1<br>(15.6)  | 83.0<br>(18.5)  | .22  |
| <b>Role-physical</b>        | 75.7<br>(25.0) | 70.9<br>(31.1) | 82.2*<br>(22.7) | 75.0<br>(30.8)  | .19  |
| <b>Bodily pain</b>          | 68.4<br>(29.1) | 60.2<br>(26.8) | 70.5<br>(27.3)  | 61.7<br>(29.6)  | .12  |
| <b>General health</b>       | 65.4<br>(20.6) | 63.9<br>(22.8) | 69.6<br>(20.9)  | 66.1<br>(23.5)  | .43  |
| <b>Vitality</b>             | 46.7<br>(20.7) | 40.1<br>(19.5) | 55.5*<br>(20.8) | 55.4*<br>(21.0) | .98  |
| <b>Social functioning</b>   | 77.0<br>(24.8) | 71.9<br>(24.5) | 83.2<br>(24.3)  | 80.6<br>(20.6)  | .57  |
| <b>Role-emotional</b>       | 84.7<br>(21.7) | 84.4<br>(21.9) | 87.6<br>(23.1)  | 87.6<br>(19.8)  | 1.00 |
| <b>Mental health</b>        | 78.2<br>(13.9) | 78.1<br>(15.8) | 79.7<br>(16.3)  | 81.6<br>(12.0)  | .50  |

CPAP=Continuous Positive Airway Pressure

MAS=Mandibular Advancement Splint

SF36 domains: Mean (standard deviation)

P: t-test between MAS and CPAP treatment groups at final follow-up

\*Statistically significant change from baseline to final follow-up within treatment group, paired t-test (P<0.05)

Supplementary Table S2 SF36 domains (0-100 scales) at baseline and final follow-up (12 months), per protocol (compliant patients only).

| SF36 domains                | Baseline       |                | Final follow-up |                 | P   |
|-----------------------------|----------------|----------------|-----------------|-----------------|-----|
|                             | CPAP<br>(n=18) | MAS<br>(n=36)  | CPAP<br>(n=18)  | MAS<br>(n=36)   |     |
| <b>Physical functioning</b> | 83.1<br>(16.9) | 84.0<br>(14.1) | 86.4<br>(15.5)  | 86.5<br>(16.1)  | .98 |
| <b>Role-physical</b>        | 74.3<br>(22.9) | 71.4<br>(33.0) | 78.1<br>(26.1)  | 78.0<br>(30.0)  | .98 |
| <b>Bodily pain</b>          | 66.2<br>(31.4) | 62.0<br>(26.8) | 64.2<br>(30.0)  | 62.8<br>(29.2)  | .87 |
| <b>General health</b>       | 64.3<br>(21.6) | 66.4<br>(22.3) | 71.3<br>(22.4)  | 71.4<br>(21.7)  | .98 |
| <b>Vitality</b>             | 47.2<br>(25.5) | 41.0<br>(19.2) | 62.2*<br>(18.0) | 60.9*<br>(16.3) | .80 |
| <b>Social functioning</b>   | 81.3<br>(24.3) | 71.9<br>(25.8) | 91.7*<br>(16.6) | 83.7*<br>(18.1) | .12 |
| <b>Role-emotional</b>       | 87.5<br>(19.6) | 83.6<br>(23.7) | 92.6<br>(16.6)  | 89.1<br>(19.4)  | .52 |
| <b>Mental health</b>        | 80.3<br>(11.8) | 77.5<br>(17.3) | 85.8<br>(11.4)  | 83.5*<br>(11.5) | .48 |

CPAP=Continuous Positive Airway Pressure

MAS=Mandibular Advancement Splint

SF36 domains: Mean (standard deviation)

P: t-test between MAS and CPAP treatment groups at final follow-up

\*Statistically significant change from baseline to final follow-up within treatment group, paired t-test (P<0.05)

Supplementary table S3 SF36 domains (0-100 scales) at baseline and final follow-up (12 months), complete cases.

| SF36 domains                | Baseline       |                | Final follow-up |                 | P   |
|-----------------------------|----------------|----------------|-----------------|-----------------|-----|
|                             | CPAP<br>(n=34) | MAS<br>(n=39)  | CPAP<br>(n=34)  | MAS<br>(n=39)   |     |
| <b>Physical functioning</b> | 84.1<br>(15.5) | 81.2<br>(17.0) | 87.1<br>(13.9)  | 83.3<br>(19.8)  | .35 |
| <b>Role-physical</b>        | 74.1<br>(25.1) | 69.6<br>(32.2) | 80.7<br>(22.9)  | 75.2<br>(31.9)  | .40 |
| <b>Bodily pain</b>          | 65.1<br>(29.4) | 60.2<br>(27.0) | 68.9<br>(28.4)  | 60.6<br>(29.5)  | .23 |
| <b>General health</b>       | 63.9<br>(20.8) | 64.3<br>(22.7) | 69.2<br>(20.7)  | 69.5<br>(22.5)  | .96 |
| <b>Vitality</b>             | 46.0<br>(21.9) | 39.1<br>(19.9) | 58.1*<br>(19.3) | 58.7*<br>(19.1) | .90 |
| <b>Social functioning</b>   | 73.9<br>(25.1) | 70.8<br>(25.5) | 86.4*<br>(22.1) | 83.7*<br>(19.9) | .58 |
| <b>Role-emotional</b>       | 83.3<br>(22.2) | 82.5<br>(22.8) | 88.5<br>(19.4)  | 88.7<br>(18.8)  | .97 |
| <b>Mental health</b>        | 77.4<br>(13.9) | 77.9<br>(16.7) | 81.0<br>(15.0)  | 83.1*<br>(11.7) | .52 |

CPAP=Continuous Positive Airway Pressure

MAS=Mandibular Advancement Splint

SF36 domains: Mean (standard deviation)

P: t-test between MAS and CPAP treatment groups at final follow-up

\*Statistically significant change from baseline to final follow-up within treatment group, paired t-test (P<0.05)

Supplementary Table S4 SF36 domains (norm-based scales) and PSQI global score at baseline and final follow-up (12 months), complete cases only.

| SF36 domains                    | Baseline       |                | Follow-up       |                 | Adj. difference<br>(95% CI) <sup>§</sup> | P <sup>§</sup> |
|---------------------------------|----------------|----------------|-----------------|-----------------|------------------------------------------|----------------|
|                                 | CPAP<br>(n=34) | MAS<br>(n=39)  | CPAP<br>(n=34)  | MAS<br>(n=39)   |                                          |                |
| <b>Physical functioning</b>     | 48.4<br>(8.3)  | 47.1<br>(8.7)  | 49.9<br>(7.7)   | 48.2<br>(10.4)  | -1.2<br>(-4.3 – 1.9)                     | .45            |
| <b>Role-physical</b>            | 49.2<br>(6.4)  | 48.1<br>(8.6)  | 50.9<br>(6.4)   | 49.6<br>(8.7)   | -1.6<br>(-4.9 – 1.7)                     | .34            |
| <b>Bodily pain</b>              | 47.8<br>(11.7) | 46.1<br>(10.3) | 49.3<br>(11.2)  | 46.2<br>(11.4)  | -1.8<br>(-6.3 – 2.8)                     | .44            |
| <b>General health</b>           | 45.6<br>(9.9)  | 46.0<br>(10.6) | 48.0<br>(9.8)   | 48.4<br>(10.4)  | -0.1<br>(-3.8 – 3.6)                     | .96            |
| <b>Vitality</b>                 | 42.3<br>(11.8) | 39.0<br>(10.2) | 48.6*<br>(10.3) | 49.2*<br>(9.5)  | 1.7<br>(-3.0 – 6.4)                      | .48            |
| <b>Social functioning</b>       | 42.7<br>(12.9) | 41.5<br>(12.7) | 49.0*<br>(11.5) | 47.8*<br>(10.0) | -0.6<br>(-5.6 – 4.4)                     | .81            |
| <b>Role-emotional</b>           | 47.8<br>(8.4)  | 47.7<br>(8.4)  | 49.7<br>(7.4)   | 49.9<br>(7.1)   | 0.6<br>(-2.6 – 3.8)                      | .72            |
| <b>Mental health</b>            | 47.0<br>(10.3) | 47.6<br>(12.0) | 49.7<br>(10.9)  | 51.3*<br>(8.3)  | 1.1<br>(-3.0 – 5.3)                      | .59            |
| <b>Physical Component Score</b> | 48.4<br>(7.4)  | 46.8<br>(9.6)  | 49.8<br>(7.5)   | 47.3<br>(10.7)  | -1.3<br>(-4.2 – 1.6)                     | .38            |
| <b>Mental Component Score</b>   | 44.6<br>(11.6) | 44.3<br>(12.2) | 49.2*<br>(10.4) | 50.6*<br>(8.1)  | 2.1<br>(-1.9 – 6.1)                      | .29            |
| <b>PSQI global score</b>        | 7.7<br>(3.4)   | 8.0<br>(3.3)   | 6.4*<br>(2.7)   | 5.8*<br>(2.6)   | -0.8<br>(-1.8 – 0.1)                     | .09            |

CPAP=Continuous Positive Airway Pressure

MAS=Mandibular Advancement Splint

PSQI=Pittsburgh Sleep Quality Index

SF36=Medical Outcomes Study Short-Form 36-Element Health Survey

SF36 domains and PSQI global score: Mean (standard deviation)

\*Statistically significant change from baseline to follow-up within treatment group, paired t-test (P<0.05)

§Difference between MAS and CPAP treatment groups at follow-up, based on linear regression analysis adjusted for baseline variables (Age, BMI, sex, smoking, baseline AHI, and the baseline SF36 domain/PSQI global score), reference group: CPAP
